# Supplementary material for: Resolving Toxic DNA repair intermediates in every E. coli replication cycle: critical roles for RecG, Uup and RadD
Source: PubMed Central journal article supplement (PMC7470958; doi:10.1093/nar/gkaa579), 2020-07-09
Supplement: gkaa579_supplemental_file.pdf [file gkaa579_supplemental_file.pdf]

## Resolving Toxic DNA Repair Intermediates in every *E. coli* Replication Cycle: Critical Roles for RecG, Uup, and RadD

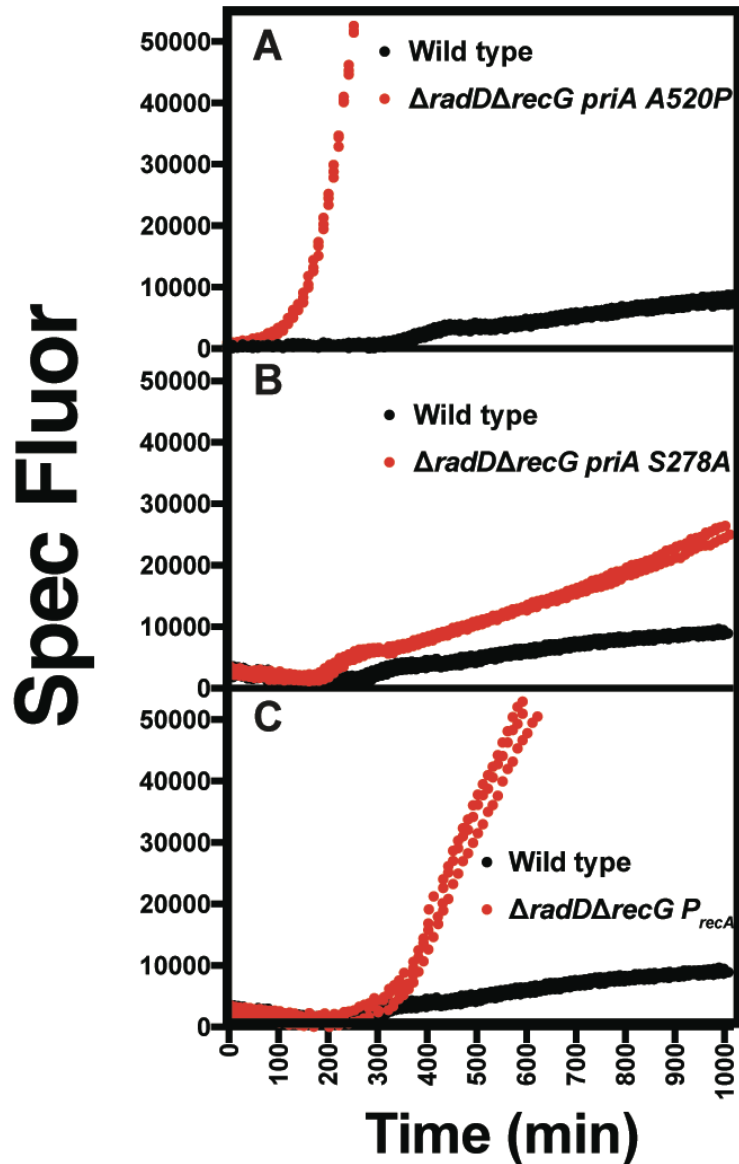

Figure S1. Fluorescent reading for SOS induction in  $\Delta radD \Delta recG$  background with each suppressor mutation over time. Wild type trace is in black and red traces have the suppressor mutation added.

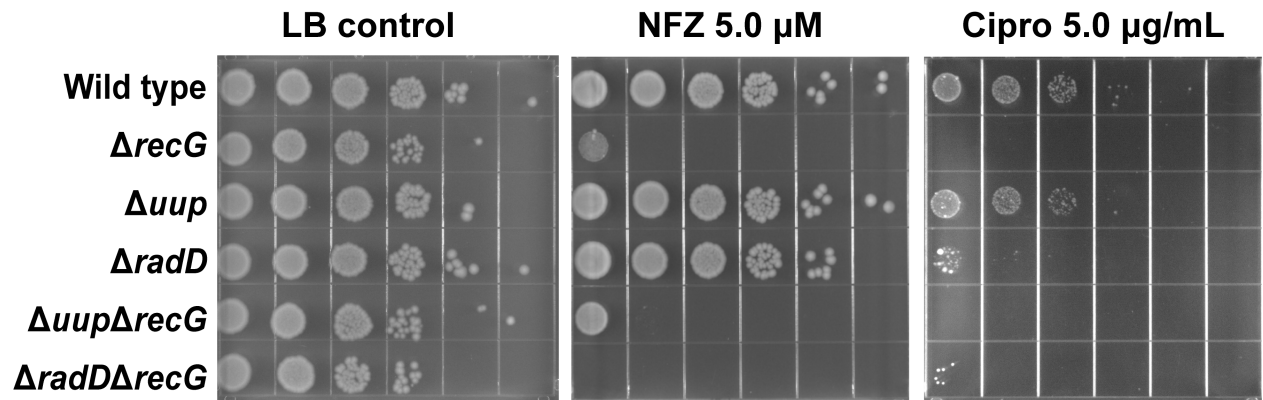

Figure S2. Spot plates showing restored sensitivity to damaging agents at higher doses of nitrofurazone and cipro for  $\Delta$ uup $\Delta$ recG strain.

| Ref ID      | Ref Pos | Gene Name        | Base Change   | Amino Acid Change |
|-------------|---------|------------------|---------------|-------------------|
| NC_000913.3 | 132923  | acnB             | C>T           | p.(=)             |
| NC_000913.3 | 803662  | ybhJ             | C>A           | p.L54I            |
| NC_000913.3 | 1170381 |                  | T>C           |                   |
| NC_000913.3 | 1196220 | icd              | C>T           | p.(=)             |
| NC_000913.3 | 1196232 | icd              | C>T           | p.(=)             |
| NC_000913.3 | 1196245 | icd              | T>C           | p.(=)             |
| NC_000913.3 | 1196247 | icd              | A>G           | p.(=)             |
| NC_000913.3 | 1196277 | icd              | C>T           | p.(=)             |
| NC_000913.3 | 1196280 | icd              | G>C           | p.(=)             |
| NC_000913.3 | 1196283 | icd              | A>G           | p.(=)             |
| NC_000913.3 | 1196292 | icd              | C>T           | p.(=)             |
| NC_000913.3 | 1196304 | icd              | G>A           | p.(=)             |
| NC_000913.3 | 1196316 | icd              | T>A           | p.D398E           |
| NC_000913.3 | 1196325 | icd              | A>G           | p.(=)             |
| NC_000913.3 | 1196352 | icd              | C>A           | p.D410E           |
| NC_000913.3 | 1351174 |                  | G>A           |                   |
| NC_000913.3 | 1523360 | yncE             | T>C           | p.(=)             |
| NC_000913.3 | 1905761 | mntP             | G>A           | p.G25D            |
| NC_000913.3 | 2173361 | gatC<br>(pseudo) | CC > del<br>2 |                   |
| NC_000913.3 | 2823830 |                  | A>G           |                   |
| NC_000913.3 | 3560455 | glpR<br>(pseudo) | - > ins G     |                   |
| NC_000913.3 | 3938501 | rbsR             | T>G           | p.L92R            |
| NC_000913.3 | 4124129 | cytR             | G>A           | p.Q110.           |
| NC_000913.3 | 4296380 |                  | - > ins CG    |                   |

Table S1. Sequencing data for the  $\Delta$ radD $\Delta$ recG isolate harboring the PrecA mutation. The suppressor mutation is highlighted in yellow.
